# Supplementary material for: Association between dietary vitamin C intake and gout among American adults
Source: PubMed Central journal article supplement (PMC11437527; doi:10.3389/fimmu.2024.1431323), 2024-09-13
Supplement: DataSheet2.pdf [file DataSheet2.pdf]

## *Supplementary Material*

### 1 Supplementary Figures and Tables

#### 1.1 Supplementary Tables

**Supplementary Table 1. Association between dietary vitamin C (<1000 mg/day) intake and gout**

| Variable          | Vitamin C intake(mg) |                 |                  |                  | <i>P</i> for trend |
|-------------------|----------------------|-----------------|------------------|------------------|--------------------|
|                   | Quartile 1           | Quartile 2      | Quartile 3       | Quartile 4       |                    |
| N                 | 3146                 | 3146            | 3146             | 3146             | 12584              |
| Gout,%            | 167 (5.3)            | 160 (5.1)       | 156 (5)          | 143 (4.5)        | 626 (5)            |
| Model1 OR (95%CI) | 1(Ref)               | 0.9 (0.72~1.13) | 0.81 (0.64~1.03) | 0.72 (0.57~0.92) | -                  |
| <i>P</i> value    |                      | 0.375           | 0.082            | 0.008*           | 0.005*             |
| Model2 OR (95%CI) | 1(Ref)               | 0.9 (0.71~1.13) | 0.82 (0.64~1.03) | 0.74 (0.58~0.95) | -                  |
| <i>P</i> value    |                      | 0.364           | 0.091            | 0.016*           | 0.011*             |
| Model3 OR (95%CI) | 1(Ref)               | 0.9 (0.71~1.13) | 0.81 (0.64~1.03) | 0.75 (0.59~0.95) | -                  |

---

|                |       |      |       |        |
|----------------|-------|------|-------|--------|
| <i>P</i> value | 0.358 | 0.09 | 0.02* | 0.014* |
|----------------|-------|------|-------|--------|

---

OR, odds ratio; CI, confidence interval; Ref: reference.

Model 1 was adjusted for sociodemographic variables (age, sex, marital status, race/ethnicity, education level, family income).

Model 2 was adjusted for sociodemographic (age, sex, marital status, race/ethnicity, education level, family income), hypertension, diabetes, coronary heart disease.

Model 3 was adjusted for sociodemographic (age, sex, marital status, race/ethnicity, education level, family income), hypertension, diabetes, coronary heart disease, smoking status, physical activity, alcohol, dietary supplements taken.  $P < 0.05$ , \*

**Supplementary Table 2. Association between dietary vitamin C intake (from the second survey) and gout**

| Variables                      | N     | Gout,<br>n,% | Crude               | Model1  |                     | Model 2     |                     | Model3      |                     |             |
|--------------------------------|-------|--------------|---------------------|---------|---------------------|-------------|---------------------|-------------|---------------------|-------------|
|                                |       |              | OR (95%CI)          | P value | OR (95%CI)          | P value     | OR (95%CI)          | P value     | OR (95%CI)          | P value     |
| Vitamin C<br>(per 100<br>mg/d) | 11030 | 566<br>(5.1) | 0.86(0.77~0.96)     | 0.01    | 0.80<br>(0.71~0.90) | <0.001<br>* | 0.81(0.72~0.91)     | <0.001<br>* | 0.81(0.72~0.91)     | <0.001<br>* |
| Quartiles                      |       |              |                     |         |                     |             |                     |             |                     |             |
| Quartile 1                     | 2756  | 151<br>(5.5) | 1(Ref)              |         | 1(Ref)              |             | 1(Ref)              |             | 1(Ref)              |             |
| Quartile 2                     | 2751  | 161<br>(5.9) | 1.07<br>(0.85~1.35) | 0.549   | 0.95<br>(0.74~1.2)  | 0.645       | 0.95<br>(0.74~1.21) | 0.671       | 0.95<br>(0.74~1.21) | 0.65        |
| Quartile 3                     | 2763  | 137 (5)      | 0.9<br>(0.71~1.14)  | 0.385   | 0.73<br>(0.57~0.94) | 0.015*      | 0.73<br>(0.57~0.94) | 0.014*      | 0.73<br>(0.57~0.94) | 0.014*      |
| Quartile 4                     | 2760  | 117<br>(4.2) | 0.76<br>(0.6~0.98)  | 0.033*  | 0.62<br>(0.48~0.8)  | <0.001<br>* | 0.65<br>(0.5~0.84)  | 0.001*      | 0.64<br>(0.49~0.84) | 0.001*      |
| P for trend                    | 11030 | 566<br>(5.1) | -                   | 0.014*  | -                   | <0.001<br>* | -                   | <0.001<br>* | -                   | <0.001<br>* |

OR, odds ratio; CI, confidence interval; Ref: reference.

Model 1 was adjusted for sociodemographic variables (age, sex, marital status, race/ethnicity, education level, family income).

Model 2 was adjusted for sociodemographic (age, sex, marital status, race/ethnicity, education level, family income), hypertension, diabetes, coronary heart disease.

Model 3 was adjusted for sociodemographic (age, sex, marital status, race/ethnicity, education level, family income), hypertension, diabetes, coronary heart disease, smoking status, physical activity, alcohol, dietary supplements taken.

$P < 0.05$ , \*

**Supplementary Table 3. Association between dietary supplemental vitamin C and gout**

| Variable                   | N        | Gout,<br>%  | Crude                 | Model1            |                        | Model2            |                        | Model3            |                        |                   |
|----------------------------|----------|-------------|-----------------------|-------------------|------------------------|-------------------|------------------------|-------------------|------------------------|-------------------|
|                            |          |             | OR (95%CI)            | <i>P</i><br>value | OR (95%CI)             | <i>P</i><br>value | OR (95%CI)             | <i>P</i><br>value | OR (95%CI)             | <i>P</i><br>value |
| Vitamin C (per100<br>mg/d) | 317<br>7 | 192<br>(6)  | 0.998<br>(0.967~1.03) | 0.912<br>6        | 0.989<br>(0.955~1.025) | 0.552             | 0.998<br>(0.964~1.032) | 0.891<br>9        | 0.997<br>(0.964~1.031) | 0.860<br>2        |
| Quartiles                  |          |             |                       |                   |                        |                   |                        |                   |                        |                   |
| Quartile 1                 | 343      | 15<br>(4.4) | 1(Ref)                |                   | 1(Ref)                 |                   | 1(Ref)                 |                   | 1(Ref)                 |                   |
| Quartile 2                 | 114<br>1 | 77<br>(6.7) | 1.58<br>(0.9~2.79)    | 0.112             | 1.00<br>(0.56~1.82)    | 0.963             | 0.99<br>(0.54~1.79)    | 0.965             | 1.00<br>(0.55~1.84)    | 0.981             |
| Quartile 3                 | 880      | 50<br>(5.7) | 1.32<br>(0.73~2.38)   | 0.361             | 0.9 (0.49~1.65)        | 0.73              | 0.92<br>(0.49~1.71)    | 0.791             | 0.94 (0.5~1.76)        | 0.845             |

|                    |          |             |                     |       |                     |       |                     |       |                     |       |
|--------------------|----------|-------------|---------------------|-------|---------------------|-------|---------------------|-------|---------------------|-------|
| Quartile 4         | 813      | 50<br>(6.2) | 1.43<br>(0.79~2.59) | 0.233 | 0.9 (0.49~1.65)     | 0.728 | 0.96<br>(0.52~1.79) | 0.896 | 0.98<br>(0.53~1.83) | 0.953 |
| <i>P</i> for trend | 317<br>7 | 192<br>(6)  | 1.03<br>(0.88~1.19) | 0.743 | 0.95<br>(0.81~1.11) | 0.501 | 0.98<br>(0.83~1.16) | 0.822 | 0.99<br>(0.84~1.16) | 0.859 |

OR, odds ratio; CI, confidence interval; Ref: reference.

Model 1 was adjusted for sociodemographic variables (age, sex, marital status, race/ethnicity, education level, family income).

Model 2 was adjusted for sociodemographic (age, sex, marital status, race/ethnicity, education level, and family income), hypertension, diabetes, coronary heart disease.

Model 3 was adjusted for sociodemographic (age, sex, marital status, race/ethnicity, education level, family income), hypertension, diabetes, coronary heart disease, smoking status, physical activity, alcohol, dietary supplements taken.  $P < 0.05$ , \*

**Supplementary Table 4. Association between Vitamin C intake and hyperuricemia**

| Variables                  | N         | Hyperuricemia, % | Crude               |                | Model 1            |                | Model 2            |                | Model 3            |                |
|----------------------------|-----------|------------------|---------------------|----------------|--------------------|----------------|--------------------|----------------|--------------------|----------------|
|                            |           |                  | OR (95%CI)          | <i>P</i> value | OR (95%CI)         | <i>P</i> value | OR (95%CI)         | <i>P</i> value | OR (95%CI)         | <i>P</i> value |
| Vitamin C<br>(per 100mg/d) | 1201<br>9 | 4097 (34.1)      | 0.99<br>(0.95~1.03) | 0.725          | 0.94<br>(0.9~0.98) | 0.007*         | 0.94<br>(0.9~0.98) | 0.005*         | 0.94<br>(0.9~0.98) | 0.005*         |
| Quartiles                  |           |                  |                     |                |                    |                |                    |                |                    |                |

|                    |           |             |                     |             |                     |             |                     |             |                     |             |
|--------------------|-----------|-------------|---------------------|-------------|---------------------|-------------|---------------------|-------------|---------------------|-------------|
| Quartile 1         | 3018      | 1126 (37.3) | 1(Ref)              |             | 1(Ref)              |             | 1(Ref)              |             | 1(Ref)              |             |
| Quartile 2         | 3029      | 977 (32.3)  | 0.8<br>(0.72~0.89)  | <0.00<br>1* | 0.78<br>(0.7~0.88)  | <0.00<br>1* | 0.78<br>(0.7~0.88)  | <0.00<br>1* | 0.77<br>(0.69~0.86) | <0.00<br>1* |
| Quartile 3         | 2985      | 1004 (33.6) | 0.85<br>(0.77~0.95) | 0.003*      | 0.83<br>(0.74~0.93) | 0.001*      | 0.83<br>(0.74~0.93) | 0.002*      | 0.81<br>(0.72~0.91) | <0.00<br>1* |
| Quartile 4         | 2987      | 990 (33.1)  | 0.83<br>(0.75~0.93) | 0.001*      | 0.74<br>(0.66~0.83) | <0.00<br>1* | 0.74<br>(0.66~0.83) | <0.00<br>1* | 0.72<br>(0.64~0.81) | <0.00<br>1* |
| <i>P</i> for trend | 1201<br>9 | 4097 (34.1) | -                   | 0.004*      | -                   | <0.00<br>1* | -                   | <0.00<br>1* | -                   | <0.00<br>1* |

OR, odds ratio; CI, confidence interval; Ref: reference.

Model 1 was adjusted for sociodemographic variables (age, sex, marital status, race/ethnicity, education level, family income).

Model 2 was adjusted for sociodemographic (age, sex, marital status, race/ethnicity, education level, and family income), hypertension, diabetes, coronary heart disease.

Model 3 was adjusted for sociodemographic (age, sex, marital status, race/ethnicity, education level, and family income), hypertension, diabetes, coronary heart disease, smoking status, physical activity, alcohol, dietary supplements taken.

#### Supplementary Table 5. Likelihood ratios for the regression

|                        | Model 1 | Model2 | Model 3 |
|------------------------|---------|--------|---------|
| Number of Observations | 12589   | 12589  | 12589   |

|          |         |        |         |
|----------|---------|--------|---------|
| AIC      | 4459.4  | 4308   | 4302.3  |
| BIC      | 4548.7  | 4419.6 | 4458.6  |
| Log.Lik. | -2217.7 | -2139  | -2130.2 |
| RMSE     | 0.21    | 0.21   | 0.21    |

AIC, Akaike's Information Criterion; BIC, Bayesian Information Criterion (*BIC*) Log.lik, Log Likelihood. RMSE, Root mean square error.;

Model 1 was adjusted for sociodemographic variables (age, sex, marital status, race/ethnicity, education level, family income).

Model 2 was adjusted for sociodemographic (age, sex, marital status, race/ethnicity, education level, family income), hypertension, diabetes, coronary heart disease.

Model 3 was adjusted for sociodemographic (age, sex, marital status, race/ethnicity, education level, family income), hypertension, diabetes, coronary heart disease, smoking status, physical activity, alcohol, dietary supplements taken.
